# Supplementary material for: Nitrogen Fertilization Increases Root Growth and Coordinates the Root–Shoot Relationship in Cotton
Source: Front Plant Sci. 2020 Jun 23;11:880. doi: 10.3389/fpls.2020.00880 (PMC7324761; doi:10.3389/fpls.2020.00880)
Supplement: Supplementary file 1 [file Data_Sheet_1.XLSX]

## Sheet: figure1 rainfall temperate
					Rainfall/mm				Soil temperature /℃
				Month	2014	2015		Month	2014	2015
				Mar	0.9	11.43		Mar	9.41259	6.86318
				Apr	24.9	28.956		Apr	17.1797	12.9607
				May	28.7	49.784		May	20.9267	17.6593
				Jun	38.7	22.352		Jun	26.0416	25.2637
				Jul	107.446	165.096		Jul	28.1557	24.9924
				Aug	104.394	116.574		Aug	24.701	25.977
				Sep	72.394	73.914		Sep	12.157	19.6241
				Oct	17.526	18.542		Oct	4.39693	13.6859
				Nov	1.016	31.242		Nov	0.0314014	2.36695
				total	395.976	517.89		total	143.003	149.393

## Sheet: figure 2 root length
				2014
					Root length	values				significances
					soil depth	N0	N1	N2	N3	soil depth	N0	N1	N2	N3
					15	289.87	309.423	418.996	322.268	15	b	b	a	b
					30	106.392	124.512	153.651	112.476	30	b	b	a	b
					45	116.899	132.617	140.456	134.384	45	b	ab	a	ab
					60	112.399	122.202	144.816	123.04	60	b	b	a	b
					75	51.4708	89.6677	116.888	97.1815	75	c	b	a	ab
					90	28.0094	45.5469	59.6543	56.6242	90	c	b	a	a
					120	27.5405	34.7341	55.3428	32.6794	120	b	b	a	b
					150	7.86	10.827	11.9437	10.8308	150	a	a	a	a
				2015	Root length	values				significances
					soil depth	N0	N1	N2	N3	soil depth	N0	N1	N2	N3
					15	349.63	356.509	474.431	401.317	15	b	b	a	b
					30	114.157	140.515	135.6	133.896	30	b	a	a	a
					45	120.803	155.338	157.43	136.887	45	b	a	a	ab
					60	88.9711	107.341	134.865	115.791	60	c	bc	a	ab
					75	61.8396	103.632	124.883	109.262	75	b	a	a	a
					90	27.7737	47.8686	52.4345	47.7201	90	c	b	a	b
					120	30.9538	34.5947	53.3929	25.9284	120	c	b	a	bc
					150	29.4975	49.3861	28.0467	17.9211	150	b	a	b	c

## Sheet: figure 3 root surface area
				2014
					Root surface area	values				significances
					soil depth	N0	N1	N2	N3	soil depth	N0	N1	N2	N3		N0	N1	N2	N3
					15	26.1141	29.5576	36.814	27.4898	15	b	b	a	b				0.409737
					30	10.1095	11.486	13.8351	10.2306	30	b	b	a	b				0.368525
					45	11.3345	13.4076	13.9982	12.9284	45	b	ab	a	ab				0.235008
					60	12.1036	13.9308	16.8635	12.8814	60	b	b	a	b				0.393263
					75	6.3695	10.94	14.4217	12.2283	75	b	a	a	a				1.26418
					90	3.2003	5.9832	7.7712	7.2005	90	b	a	a	a				1.42827
					120	2.9904	4.7665	6.3702	4.5982	120	b	ab	a	ab				1.13022
					150	0.7076	1.1372	1.1914	1.1096	150	a	a	a	a				0.68372
				2015
					Root surface area	values				significances
					soil depth	N0	N1	N2	N3	soil depth	N0	N1	N2	N3
					15	44.4669	45.3453	57.4133	52.5835	15	b	b	a	ab				0.291147
					30	13.4534	17.2788	17.4328	15.7368	30	b	a	a	ab				0.295791
					45	14.328	19.8338	19.2419	16.6577	45	b	a	a	ab				0.342958
					60	11.7979	14.7768	18.3436	15.4844	60	b	ab	a	ab				0.554819
					75	8.5284	15.0221	18.4318	15.5261	75	b	a	a	a				1.16123
					90	3.7339	7.024	8.1262	7.4266	90	b	a	a	a				1.17633
					120	4.639	5.54	7.532	3.8266	120	bc	b	a	c				0.623626
					150	3.8013	8.2995	4.2265	2.6023	150	b	a	b	b				0.111856

## Sheet: figure 4 root volume
				2014
					Root volume	values				significances
					soil depth	N0	N1	N2	N3	soil depth	N0	N1	N2	N3
					15	0.191	0.2302	0.2477	0.1897	15	a	a	a	a
					30	0.0781	0.0864	0.1016	0.076	30	b	ab	a	b
					45	0.0891	0.1106	0.1124	0.1013	45	a	a	a	a
					60	0.1053	0.128	0.1612	0.1146	60	b	ab	a	b
					75	0.0657	0.1074	0.1436	0.1253	75	b	ab	a	a
					90	0.0304	0.065	0.0843	0.076	90	b	a	a	a
					120	0.0259	0.0551	0.0646	0.0559	120	b	ab	a	ab
					150	0.0053	0.0121	0.0107	0.0107	150	a	a	a	a
				2015	Root volume	values				significances
					soil depth	N0	N1	N2	N3	soil depth	N0	N1	N2	N3
					15	0.4548	0.4611	0.568	0.5516	15	a	a	a	a
					30	0.1272	0.1741	0.1804	0.1506	30	b	a	a	ab
					45	0.1379	0.2035	0.1877	0.1624	45	b	a	ab	ab
					60	0.1266	0.1637	0.2	0.1673	60	b	ab	a	ab
					75	0.0943	0.1752	0.2198	0.1782	75	b	a	a	a
					90	0.042	0.084	0.1026	0.0941	90	b	a	a	a
					120	0.0578	0.0744	0.0868	0.0487	120	ab	ab	a	b
					150	0.0421	0.1166	0.0542	0.0328	150	b	a	b	b

## Sheet: figure 5 root biomass
				2014	Root biomass	values				significances
					soil depth	N0	N1	N2	N3	soil depth	N0	N1	N2	N3
					15	0.0337597	0.0418741	0.0517321	0.0433667	15	b	ab	a	ab
					30	0.0159994	0.0167573	0.0245833	0.0182611	30	b	ab	a	ab
					45	0.0152278	0.0159593	0.0179183	0.0148852	45	a	a	a	a
					60	0.0145336	0.0191444	0.0203721	0.0174492	60	b	ab	a	ab
					75	0.0103667	0.0154906	0.012177	0.0130019	75	b	a	ab	ab
					90	0.00743241	0.00935926	0.00579306	0.0130278	90	ab	ab	b	a
					120	0.00332275	0.00437037	0.00441852	0.00714907	120	b	ab	ab	a
					150	0.000907407	0.00117037	0.00112817	0.000935185	150	a	a	a	a
				2015	Root biomass	values				significances
					soil depth	N0	N1	N2	N3	soil depth	N0	N1	N2	N3
					15	0.0367111	0.0401056	0.0474894	0.0419011	15	b	ab	a	ab
					30	0.0116694	0.0168811	0.0341083	0.0129533	30	b	b	a	b
					45	0.00869278	0.0107194	0.0157389	0.00985333	45	a	a	a	a
					60	0.00900833	0.0114722	0.0146589	0.00877222	60	b	ab	a	b
					75	0.00528889	0.00943	0.0116711	0.0109089	75	b	ab	a	ab
					90	0.002955	0.00511556	0.00632	0.00575667	90	b	ab	a	a
					120	0.00493889	0.00933667	0.00382222	0.00582278	120	a	a	a	a
					150	0.00522222	0.00585889	0.00206667	0.00652222	150	a	a	a	a

## Sheet: figure 6 total root morphology 
			2014
				total root length			total root surface area			total root volume			total root biomass
				N0	740.441		N0	72.9295		N0	0.5909		N0	0.1015
				N1	869.53		N1	91.2089		N1	0.7948		N1	0.1241
				N2	1101.75		N2	111.265		N2	0.9261		N2	0.1381
				N3	889.483		N3	88.6667		N3	0.7437		N3	0.1281
			2015
				total root length			total root surface area			total root volume			total root biomass
				N0	823.625		N0	104.749		N0	1.0826		N0	0.0858
				N1	995.184		N1	133.12		N1	1.4526		N1	0.1089
				N2	1161.08		N2	150.748		N2	1.5994		N2	0.1359
				N3	988.722		N3	129.844		N3	1.3856		N3	0.1012

## Sheet: figure 7 shoot biomass
				2014		Leaf biomass	Stem biomass	Boll biomass	Total biomass
					N0	24.265	18.92	30.4067	73.5917
					N1	34.0083	25.3733	49.6383	109.02
					N2	45.585	36.7583	91.6083	173.952
					N3	39.665	33.6517	49.8583	123.175
				2015		Leaf biomass	Stem biomass	Boll biomass	Total biomass
					N0	35.1517	54.2567	69.36	158.768
					N1	53.8067	63.465	74.0617	191.333
					N2	69.2967	68.7417	81.5683	219.607
					N3	56.6733	66.7283	75.75	199.152

## Sheet: figure 8 coefficiets 
						TABLE 4. Correlation coefficients among the total root morphology indexes and shoot biomass at the flowering and boll period.
						Year	Index	TRL	TSA	TRPA	TAD	TRV	TRB	TSB	LB	SB	BB
						2014	TRL	1
							TSA	0.989*	1
							TRPA	0.989*	1.000**	1
							TAD	0.246597	0.360454	0.360452	1
							TRV	0.958*	0.989*	0.989*	0.491639	1
							TRB	0.920726	0.935987	0.935986	0.555502	0.949349	1
							TSB	0.995**	0.979*	0.979*	0.262774	0.947	0.941234	1
							LB	0.94	0.928	0.928	0.405696	0.915	0.982*	0.967*	1
							SB	0.891	0.859	0.859	0.32366	0.832	0.942095	0.932	0.985*	1
							BB	0.994**	0.982*	0.982*	0.179613	0.944	0.87684	0.980*	0.899	0.843	1
						2015	TRL	1
							TSA	0.992**	1
							TRPA	0.992**	1.000**	1
							TAD	0.695	0.781	0.781	1
							TRV	0.972*	0.994**	0.994**	0.845	1
							TRB	0.979*	0.960*	0.960*	0.619	0.933	1
							TSB	0.979*	0.980*	0.980*	0.727	0.966*	0.727	1
							LB	0.987*	0.988*	0.988*	0.736	0.975*	0.736	0.999**	1
							SB	0.918	0.937	0.937	0.78	0.936	0.78	0.978*	0.970*	1
							BB	0.986*	0.963*	0.963*	0.597	0.929	0.597	0.979*	0.981*	0.92	1

## Sheet: figure 9 seed cotton yield 
										sedd yield	SE	significances
									N0	2337.33	54.4866	c
									N1	2598.01	51.0119	b
									N2	2796.3	90.2152	a
									N3	2499.1	57.9107	bc
